## Expression of Concern

# Expression of Concern: VCAM-1-targeted and PPAR $\delta$ -agonist-loaded nano micelles enhanced suppressing effects on apoptosis and migration of oxidized low-density lipoprotein-induced vascular smooth muscle cells

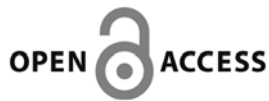

The Editorial Office has been made aware of potential issues surrounding the scientific validity of this paper, hence has issued an expression of concern to notify readers whilst the Editorial Office investigates.

Version of Record published:  
24 June 2020
